# Supplementary material for: Combined Venom Gland Transcriptomic and Venom Peptidomic Analysis of the Predatory Ant Odontomachus monticola
Source: PubMed Central journal article supplement (PMC5666370; doi:10.3390/toxins9100323), 2017-10-13
Supplement: toxins-09-00323-s001.pdf [file toxins-09-00323-s001.pdf]

# Supplementary Materials: Combined Venom Gland Transcriptomic and Venom Peptidomic Analysis of the Predatory Ant *Odontomachus monticola*

Kohei Kazuma, Keiichi Masuko, Katsuhiko Konno and Hidetoshi Inagaki

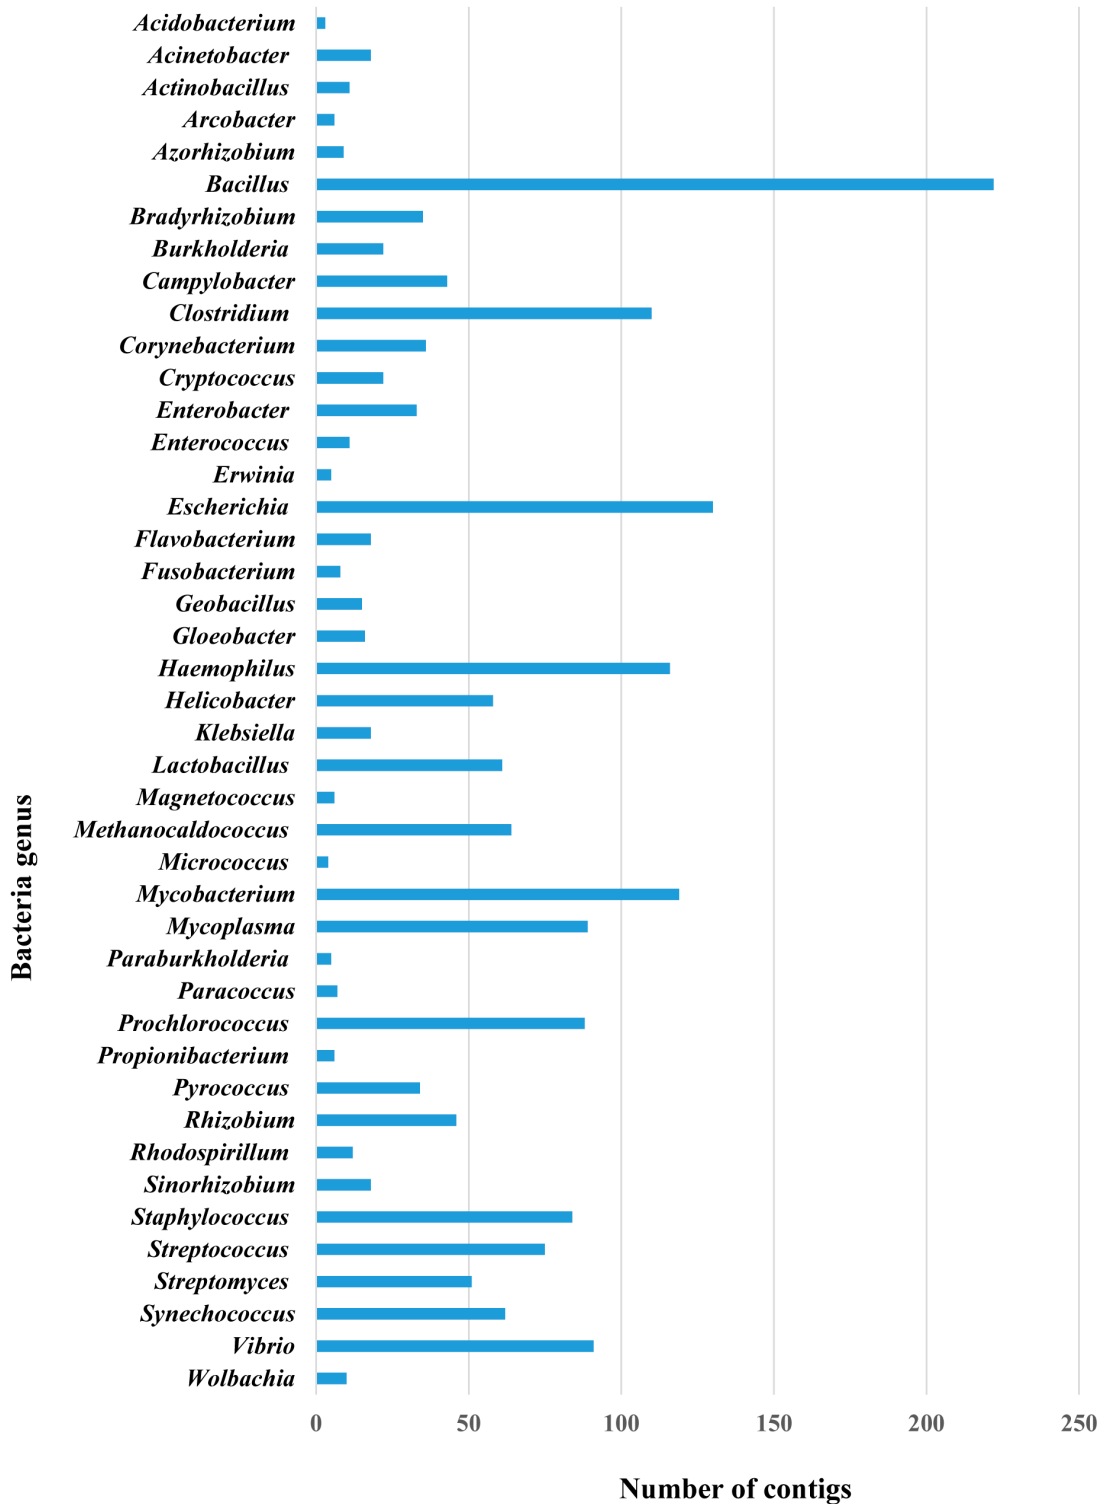

Figure S1. Number of contigs derived from various bacterial genera.

Table S1. Other toxin-like peptides and proteins.

| The putative toxin name              | Contig ID        | ACC number | Length (bp) | Reads | Identity with corresponding ortholog                                                                                                             | Potential function                          |
|--------------------------------------|------------------|------------|-------------|-------|--------------------------------------------------------------------------------------------------------------------------------------------------|---------------------------------------------|
| Venom allergen 1 (PLA <sub>1</sub> ) | Om11857_c0_g1_i2 | FX985511   | 1637        | 1668  | <i>Ooceraea biroi</i> Phospholipase A <sub>1</sub> (EZA56721.1) 53.0%                                                                            | Venom diffusion<br>Tissue damage<br>Allergy |
| Venom allergen 2                     | Om26417_c0_g1_i1 | FX985512   | 707         | 48    | <i>Solenopsis geminata</i> venom allergen 4 (Q9NH75.1) 26.9%<br><i>Dinoponera quadriceps</i> uncharacterized protein (XP_014487550.1) 46.8%      | Allergy                                     |
| Venom allergen 3                     | Om7646_c0_g1_i1  | FX985513   | 994         | 1945  | <i>Dinoponera quadriceps</i> venom allergen 3-like (XP_014469499.1) 60.6%                                                                        | Allergy                                     |
| Venom allergen 4                     | Om27249_c0_g1_i1 | FX985514   | 692         | 423   | <i>Solenopsis invicta</i> Venom allergen 4 (XP_011172701.1) 24.8%<br><i>Dinoponera quadriceps</i> uncharacterized protein (XP_014487550.1) 36.8% | Allergy                                     |
| Venom acid phosphatase 1             | Om3982_c1_g1_i1  | FX985517   | 705         | 73    | <i>Ooceraea biroi</i> Venom phosphatase A1 (EZA56721.1) 53.6%                                                                                    |                                             |
| Venom acid phosphatase 2             | Om13241_c0_g1_i2 | FX985518   | 773         | 95    | <i>Harpegnathos saltator</i> venom acid phosphatase Acph-1 (XP_011144396.1) 72.4%                                                                | Allergy                                     |
| Venom acid phosphatase 3             | Om8247_c0_g2_i1  | FX985519   | 2526        | 1543  | <i>Harpegnathos saltator</i> venom acid phosphatase Acph-1 (XP_011149152.2) 68.3%                                                                |                                             |
| Venom serine protease 1              | Om8957_c0_g1_i1  | FX985522   | 1625        | 2434  | <i>Harpegnathos saltator</i> venom serine protease Bi-VSP (XP_011142320.1) 82.4%                                                                 |                                             |
| Venom serine protease 2              | Om7503_c0_g1_i1  | FX985523   | 1483        | 1416  | <i>Dinoponera quadriceps</i> venom protease-like (XP_014477083.1) 62.8%                                                                          | Venom diffusion<br>Tissue damage            |
| Venom serine protease 3              | Om13129_c3_g1_i3 | FX985524   | 3750        | 810   | <i>Harpegnathos saltator</i> serine protease snake-like (XP_011142690.1) 79.5%                                                                   |                                             |
| Venom serine protease 4              | Om10669_c0_g1_i1 | FX985525   | 3565        | 78    | <i>Harpegnathos saltator</i> serine protease snake (EFN89361.1) 75.1%                                                                            |                                             |
| Waprin-like 1                        | Om9947_c0_g4_i1  | FX985515   | 1034        | 852   | <i>Dinoponera quadriceps</i> waprin-Thr1-like (XP_014487667.1) 85.6%                                                                             | Not classified<br>(Protease Inhibitor)      |
| Waprin-like 2                        | Om5029_c0_g2_i1  | FX985516   | 1486        | 573   | <i>Dinoponera quadriceps</i> waprin-Phi1-like (XP_014487661.1) 87.3%                                                                             |                                             |
| VEGF                                 | Om8718_c0_g1_i1  | FX985521   | 3797        | 1781  | <i>Habropoda laboriosa</i> VEGF-like protein (KOC69027.1) 48.4%<br><i>Harpegnathos saltator</i> uncharacterized protein (XP_019698417.1) 64.7%   | Venom diffusion                             |
| Phospholipase D1                     | Om8739_c0_g1_i2  | FX985534   | 3359        | 536   | <i>Harpegnathos saltator</i> phospholipase D1 (XP_019701186.1) 91.1%                                                                             | Venom diffusion                             |
| Kazal Protease Inhibitor             | Om10389_c0_g1_i1 | FX985520   | 819         | 727   | <i>Drosophila busckii</i> Kaz1-ORFB (ALC43924.1) 51.9%<br><i>Harpegnathos saltator</i> uncharacterized protein (XP_011137886.1) 77.1%            | Not classified<br>(Protease Inhibitor)      |

|                                |                  |          |      |      |                                                                                                                                                         |                                     |
|--------------------------------|------------------|----------|------|------|---------------------------------------------------------------------------------------------------------------------------------------------------------|-------------------------------------|
| Kunitz type protease inhibitor | Om26503_c0_g1_i1 | FX985536 | 543  | 716  | <i>Vollenhovia emeryi</i> kunitz-type serine protease inhibitor (XP_011873052.1) 52.5%                                                                  | Not classified (Protease Inhibitor) |
| Venom metalloproteinase 1      | Om13234_c6_g1_i8 | FX985526 | 3368 | 142  | <i>Harpegnathos saltator</i> ADAM with thrombospondin motifs (XP_011152782.1) 95.8%                                                                     |                                     |
| Matrix metalloproteinase 2     | Om13249_c2_g1_i2 | FX985527 | 3610 | 105  | <i>Harpegnathos saltator</i> MMP-2 (XP_011138596.1) 87.8%                                                                                               |                                     |
| Matrix metalloproteinase 14    | Om12910_c3_g1_i1 | FX985528 | 4848 | 79   | <i>Dinoponera quadriceps</i> MMP-14 isoform X3 (XP_014475594.1) 93.8%                                                                                   | Venom diffusion<br>Tissue damage    |
| ADAM 12                        | Om12161_c0_g1_i2 | FX985529 | 5791 | 126  | <i>Harpegnathos saltator</i> ADAM 19 (XP_011140269.2) 86.6%                                                                                             |                                     |
| ADAM TS 7                      | Om480_c0_g1_i1   | FX985530 | 3684 | 127  | <i>Dinoponera quadriceps</i> ADAM with thrombospondin motifs 7-like (XP_014473812.1) 94.2%                                                              |                                     |
| ADAM1 10                       | Om10140_c0_g1_i2 | FX985531 | 3355 | 113  | <i>Harpegnathos saltator</i> ADAM 10 (XP_011153168.1) 96.4%                                                                                             |                                     |
| Secapin                        | Om3630_c0_g1_i1  | FX985535 | 994  | 465  | <i>Camponotus floridanus</i> Secapin (AEM44798.1) 67.5%<br><i>Dinoponera quadriceps</i> uncharacterized protein (XP_014488812.1) 70.6%                  | Allergy                             |
| Carboxypeptidase               | Om9464_c0_g1_i1  | FX985537 | 2025 | 2618 | <i>Harpegnathos saltator</i> venom serine carboxypeptidase (XP_011143619.1) 84.1%                                                                       | Allergy                             |
| Venom carboxylesterase 1       | Om13001_c0_g1_i2 | FX985532 | 2862 | 4017 | <i>Harpegnathos saltator</i> venom carboxylesterase-6-like (XP_011149322.1) 78.2%                                                                       |                                     |
| Venom carboxylesterase 2       | Om21361_c0_g1_i1 | FX985533 | 1842 | 1457 | <i>Harpegnathos saltator</i> venom Esterase FE4 (EFN85480.1) 76.0%<br><i>Dinoponera quadriceps</i> venom carboxylesterase-6-like (XP_014477483.1) 70.9% | Allergy                             |

Potential function was followed by classification of dos Santos *et al* [25]. *O. monticola* toxin-like peptides and their orthologues were aligned by the John-Hein method in Lasergene 12 (DNASTAR, Madison, WI, USA).

**Table S2.** Alignments of pilosulin-like peptide 1, 2, and 3 amino acid sequences from peptidomic and transcriptomic analyses.

| Peptide Name | Retention time | Observed/Theoretical<br>molecular mass | Amino acid sequence                    |
|--------------|----------------|----------------------------------------|----------------------------------------|
|              | 8.15           | 787.423                                | GLLDWVGK                               |
|              | 8.55           | 1291.677                               | KVMDWLKDKM-NH <sub>2</sub>             |
|              | 9.08           | 1163.582                               | VMDWLKDKM-NH <sub>2</sub>              |
|              | 11.86          | 2077.083                               | GLLDWVGKKVMDWLKDKM-NH <sub>2</sub>     |
|              | 12.75          | 2061.090                               | GLLDWVGKKVMDWLKDKM-NH <sub>2</sub>     |
| PLP1         |                | 2061.090                               | GLLDWVGKKVMDWLKDKM-NH <sub>2</sub>     |
|              | 9.21           | 793.412                                | GWGSLFK                                |
|              | 9.40           | 894.458                                | GWGSLFKT                               |
|              | 9.54           | 1309.685                               | GWGSLFKTVGKM                           |
|              | 10.95          | 1991.142                               | GWGSLFKTVGKMLAKAAVK                    |
| PLP2         |                | 3361.753                               | GWGSIFKTVGKMIAKAAVKAAPEAISAMASQNE      |
|              | 8.75           | 1776.795                               | EAAANAAASEALSAMASQNE                   |
|              | 11.08          | 2319.098                               | KTALEAANAAASEALSAMASQNE                |
| PLP3         |                | 4229.336                               | KIKWGKIFKGGKLIKTALEAANAAASEALSAMASQNEK |
